# Supplementary material for: Variants in the 15q24/25 Locus Associate with Lung Function Decline in Active Smokers
Source: PLoS One. 2013 Jan 18;8(1):e53219. doi: 10.1371/journal.pone.0053219 (PMC3548843; doi:10.1371/journal.pone.0053219)
Supplement: Material S3 — Statistical analysis. (DOC) [file pone.0053219.s003.doc]

**Supplementary Material S3. STATISTICAL ANALYSIS**

**Power calculations**: we calculated the observed power to discover a significant association of genotypes, smoking status (current versus former) and the genotype*smoking status interaction term with lung function decline over a three-year follow-up period, as shown in Table S1.

Regarding the observed power for the association between decline in FEV1/FVC and the genotype*smoking status interaction, the established power of 81.9% and 88.0%, respectively for rs1051730 and rs8034191, indicates that there is a high probability that the absence of an association between genotype*former smoking status and lung function decline is a true negative finding. The same rationale applies to the observations for decline in MEF50.

In addition, to further demonstrate that the smaller sample size of the group of former smokers (n=479 compared with 753 current smokers) did not influence our findings, we stratified this group of ex-smokers according to rs1051730 genotypes and used the non-inferiority or equivalent approach, as described previously , to calculate a one-sided 95% confidence interval (CI) of the ratio of two means. We determined the two-sided 90% CI’s (which corresponds to a one one-sided 95% CI) for the differences between the ln-transformed FEV1/FVC values in the AA-, AG- and GG- genotypes of rs1051730. The width of those intervals is directly related to the power of the analysis. The largest difference in this stratified analysis appeared to be between AA- and AG-genotypes with a ratio of exp(0.010447)=101.105%. In other words, FEV1/FVC for AA-carriers at follow-up was 1.0111 times the value of AG-carriers. The 90% CI of that ratio ranges from exp(-0.006822) to exp(0.027715) or from 0.9932 to 1.0281. This means that, in the population of former smokers, the FEV1/FVC values will, with 90% certainty, be within the range of 99.320% to 102.810% of the FEV1/FVC value of AA-carriers at follow-up. The width of this interval is 101.105 – 99.320 = 1.785%. This means that the difference in FEV1/FVC between AA- and AG-carriers for rs1051730 will, with 95% certainty, not exceed 1.785% of the FEV1/FVC value at follow-up. Analogously, the FEV1/FVC difference between the GG and AG groups of rs8034191 will not exceed 0.8% of the actual mean FEV1/FVC in the GG group.

References

1. Schuirmann DJ (1987) A comparison of the two one-sided tests procedure and the power approach for assessing the equivalence of average bioavailability. J Pharmacokinet Biopharm 15: 657-680.

**Table S1.** The observed power for each test was calculated by use of the Generalized Linear Models method in SPSS (SPSS software version 18.0, Chicago, Illinois, USA).

|  | **Observed power** |
| --- | --- |
| **1. Decline in FEV1/FVC** |  |
| genotype |  |
| rs1051730 | 24% |
| rs8034191 | 15.2% |
| smoking status | 100% |
| genotype * smoking status interaction |  |
| rs1051730 | 81.9% |
| rs8034191 | 88.0% |
| **2. Decline in FEV1** |  |
| Genotype |  |
| rs1051730 | 5.8% |
| rs8034191 | 7.8% |
| smoking status | 91% |
| genotype * smoking status interaction | |
| rs1051730 | 33.4% |
| rs8034191 | 45% |
| **3. Decline in MEF50** |  |
| Genotype |  |
| rs1051730 | 15.3% |
| rs8034191 | 10.5% |
| smoking status | 95% |
| genotype * smoking status interaction | |
| rs1051730 | 59.3% |
| rs8034191 | 62.8% |
